# Supplementary material for: Expression and interactions of stereochemically active lone pairs and their relation to structural distortions and thermal conductivity
Source: PubMed Central journal article supplement (PMC7201275; doi:10.1107/s2052252520003619), 2020-03-31
Supplement: m-07-00480-sup1.pdf [file m-07-00480-sup1.pdf]

# IUCrJ

**Volume 7 (2020)**

**Supporting information for article:**

**Expression and interactions of stereochemically active lone pairs  
and their relation to structural distortions and thermal conductivity**

**Kasper Tolborg, Carlo Gatti and Bo B. Iversen**

## S1. Geometry optimization

The full geometry, i.e. unit cell and fractional coordinates, were optimized starting from the structure from Roelsgaard *et al.* (2016) according to the information given in the manuscript. In Table S1, a comparison of the optimized structure with the 100 K experimental structure is given.

**Table S1** Optimized geometry and experimental geometry. The numbers in parentheses are the percentage deviation from experimental values

| Parameter | Optimized              | Experimental          |
|-----------|------------------------|-----------------------|
| a (Å)     | 8.65577671 (-0.40 %)   | 8.6905                |
| c (Å)     | 6.01823632 (+0.26 %)   | 6.0024                |
| Mn        | (0,0.5,0.25)           | (0,0.5,0.25)          |
| Sb        | (0.17886,0.16577,0.5)  | (0.17912,0.16801,0.5) |
| O1        | (0.17847,0.32153,0.25) | (0.1795,0.3205,0.25)  |
| O2        | (0.40618,0.15253,0.5)  | (0.4005,0.1450,0.5)   |
| Mn-O1 (Å) | 2.1847 (-0.83 %)       | 2.203                 |
| Mn-O2 (Å) | 2.1602 (+0.85 %)       | 2.142                 |
| Sb-O1 (Å) | 2.0203 (+0.94 %)       | 2.002                 |
| Sb-O2 (Å) | 1.9710 (+1.91 %)       | 1.934                 |

## S2. ICSD search

**Table S2** All structures with space group number and ICSD code used in the final analysis of bond angles in  $\text{SbX}_3$  ( $X=\text{O},\text{S},\text{Se}$ ) units. There are 77 structures in total with 137 unique connected  $\text{SbX}_3$  units and 37 unique isolated  $\text{SbX}_3$  units.

| Chemical Formula                          | Space Group number | ICSD code | Connected units | Isolated units |
|-------------------------------------------|--------------------|-----------|-----------------|----------------|
| $\text{MgSb}_2\text{O}_4$                 | 135                | 4122      | 1               | 0              |
| $\text{Ba}_3(\text{SbO}_3)_2$             | 2                  | 413764    | 0               | 3              |
| $\text{Sr}_5\text{Sb}_{22}\text{O}_{38}$  | 14                 | 425765    | 5               | 0              |
| $\text{Na}_3(\text{SbO}_3)$               | 217                | 23346     | 0               | 1              |
| $\text{LiSbO}_2$                          | 14                 | 262075    | 2               | 0              |
| $\text{K}_3(\text{SbO}_3)$                | 198                | 279579    | 0               | 1              |
| $\text{Cs}_3(\text{SbO}_3)$               | 198                | 279580    | 0               | 1              |
| $\text{KSb}_3\text{O}_5$                  | 14                 | 28493     | 2               | 0              |
| $\text{NaSb}_5\text{O}_8$                 | 2                  | 28494     | 3               | 0              |
| $\text{Cs}_2\text{SbO}_{2.5}$             | 8                  | 411212    | 2               | 0              |
| $\text{Rb}_2(\text{Sb}_8\text{O}_{13})$   | 11                 | 412329    | 7               | 0              |
| $\text{Fe}(\text{Sb}_2\text{O}_4)$        | 14                 | 155152    | 2               | 0              |
| $(\text{Sb}_4\text{O}_5)(\text{ReO}_4)_2$ | 2                  | 165619    | 4               | 0              |
| $\text{Cu}(\text{Sb}_2\text{O}_4)$        | 106                | 190731    | 1               | 0              |
| $\text{Sb}_2\text{VO}_5$                  | 62                 | 203130    | 1               | 0              |
| $\text{MnSb}_2\text{O}_4$                 | 135                | 243444    | 1               | 0              |
| $\text{CoSb}_2\text{O}_4$                 | 135                | 262627    | 1               | 0              |
| $\text{Sb}_2\text{VO}_5$                  | 15                 | 27800     | 1               | 0              |
| $\text{ZnSb}_2\text{O}_4$                 | 135                | 31996     | 1               | 0              |

|                                                                    |     |        |    |   |
|--------------------------------------------------------------------|-----|--------|----|---|
| FeO(Sb <sub>2</sub> O <sub>3</sub> )                               | 135 | 4459   | 1  | 0 |
| Sb <sub>2</sub> (MoO <sub>6</sub> )                                | 2   | 59292  | 8  | 0 |
| Sb <sub>2</sub> WO <sub>6</sub>                                    | 1   | 75595  | 2  | 0 |
| NiSb <sub>2</sub> O <sub>4</sub>                                   | 135 | 86492  | 1  | 0 |
| Ba <sub>4</sub> Sb <sub>4</sub> Se <sub>11</sub>                   | 58  | 31500  | 3  | 1 |
| BaSb <sub>2</sub> Se <sub>4</sub>                                  | 14  | 32040  | 2  | 0 |
| Ba <sub>3</sub> Sb <sub>2</sub> Se <sub>7</sub>                    | 15  | 429279 | 0  | 2 |
| KSbSe <sub>2</sub>                                                 | 2   | 100125 | 1  | 0 |
| CsSbSe <sub>2</sub>                                                | 14  | 20773  | 2  | 0 |
| K <sub>2</sub> (Sb <sub>4</sub> Se <sub>8</sub> )                  | 2   | 402886 | 1  | 0 |
| Rb <sub>2</sub> (Sb <sub>4</sub> Se <sub>8</sub> )                 | 2   | 402887 | 1  | 0 |
| Na <sub>3</sub> SbSe <sub>3</sub>                                  | 198 | 425125 | 0  | 1 |
| CsSb <sub>2</sub> Se <sub>4</sub>                                  | 2   | 61220  | 1  | 0 |
| RbSb <sub>3</sub> Se <sub>5</sub>                                  | 14  | 64672  | 3  | 0 |
| KSbSe <sub>2</sub>                                                 | 1   | 660008 | 2  | 0 |
| K <sub>3</sub> SbSe <sub>3</sub>                                   | 198 | 89607  | 0  | 1 |
| Rb <sub>3</sub> SbSe <sub>3</sub>                                  | 198 | 89608  | 0  | 1 |
| Cs <sub>3</sub> SbSe <sub>3</sub>                                  | 198 | 89609  | 0  | 1 |
| CuSbSe <sub>2</sub>                                                | 62  | 238476 | 1  | 0 |
| Cu <sub>3</sub> SbSe <sub>3</sub>                                  | 62  | 401095 | 0  | 1 |
| Ag <sub>5</sub> SbSe <sub>4</sub>                                  | 36  | 427307 | 0  | 1 |
| Ag <sub>3</sub> SbSe <sub>3</sub>                                  | 62  | 427308 | 0  | 3 |
| SbCrSe <sub>3</sub>                                                | 62  | 84866  | 1  | 0 |
| Ca <sub>2</sub> Sb <sub>2</sub> S <sub>5</sub>                     | 14  | 201044 | 1  | 1 |
| Sr <sub>3</sub> Sb <sub>4</sub> S <sub>9</sub>                     | 33  | 201400 | 3  | 0 |
| Ba <sub>8</sub> (Sb <sub>6</sub> S <sub>17</sub> )                 | 13  | 26434  | 2  | 3 |
| BaSb <sub>2</sub> S <sub>4</sub>                                   | 14  | 38372  | 2  | 0 |
| Ba <sub>3</sub> Sb <sub>2</sub> S <sub>7</sub>                     | 15  | 429278 | 0  | 2 |
| Sr <sub>6</sub> Sb <sub>6</sub> S <sub>17</sub>                    | 19  | 90094  | 6  | 0 |
| RbSbS <sub>2</sub>                                                 | 1   | 200263 | 2  | 0 |
| CsSbS <sub>2</sub>                                                 | 14  | 200798 | 1  | 0 |
| Cs <sub>4</sub> Sb <sub>14</sub> S <sub>23</sub>                   | 2   | 20866  | 14 | 0 |
| Cs <sub>2</sub> Sb <sub>4</sub> S <sub>7</sub>                     | 14  | 2193   | 3  | 0 |
| Rb <sub>2</sub> Sb <sub>4</sub> S <sub>7</sub>                     | 2   | 2194   | 2  | 0 |
| K <sub>2</sub> Sb <sub>4</sub> S <sub>7</sub>                      | 15  | 25329  | 1  | 0 |
| K(Sb <sub>5</sub> S <sub>8</sub> )                                 | 7   | 410178 | 7  | 0 |
| Li <sub>3</sub> SbS <sub>3</sub>                                   | 33  | 424834 | 0  | 1 |
| Na <sub>3</sub> SbS <sub>3</sub>                                   | 198 | 425458 | 0  | 1 |
| Cs <sub>3</sub> SbS <sub>3</sub>                                   | 198 | 426551 | 0  | 1 |
| K <sub>3</sub> SbS <sub>3</sub>                                    | 198 | 426552 | 0  | 1 |
| Rb <sub>3</sub> SbS <sub>3</sub>                                   | 198 | 426554 | 0  | 1 |
| Li <sub>3</sub> S <sub>18</sub> Sb <sub>11</sub>                   | 2   | 433665 | 10 | 0 |
| RbSbS <sub>2</sub>                                                 | 2   | 56788  | 1  | 0 |
| Cs <sub>2</sub> (S <sub>2</sub> )(Sb <sub>4</sub> S <sub>6</sub> ) | 2   | 67976  | 1  | 0 |
| AgSbS <sub>2</sub>                                                 | 9   | 16578  | 2  | 0 |
| CuSbS <sub>2</sub>                                                 | 62  | 171051 | 1  | 0 |

|                                     |     |        |   |   |
|-------------------------------------|-----|--------|---|---|
| HgSb <sub>4</sub> S <sub>8</sub>    | 15  | 174377 | 4 | 0 |
| Ag <sub>3</sub> SbS <sub>3</sub>    | 161 | 181518 | 0 | 1 |
| Ag <sub>5</sub> SbS <sub>4</sub>    | 36  | 290662 | 0 | 1 |
| Ag <sub>3</sub> (SbS <sub>3</sub> ) | 14  | 33714  | 0 | 1 |
| Cu <sub>3</sub> (SbS <sub>3</sub> ) | 19  | 403113 | 0 | 1 |
| MnSb <sub>2</sub> S <sub>4</sub>    | 12  | 411178 | 2 | 0 |
| MnSb <sub>2</sub> S <sub>4</sub>    | 62  | 56379  | 2 | 0 |
| CrSbS <sub>3</sub>                  | 62  | 74601  | 1 | 0 |
| Cu <sub>3</sub> SbS <sub>3</sub>    | 14  | 74901  | 0 | 2 |
| AgSbS <sub>2</sub>                  | 5   | 85130  | 2 | 0 |
| FeSb <sub>2</sub> S <sub>4</sub>    | 62  | 93911  | 2 | 0 |
| AgSbS <sub>2</sub>                  | 15  | 94647  | 1 | 0 |

---
